# Supplementary material
Source: PubMed Central journal article supplement (PMC6015747)

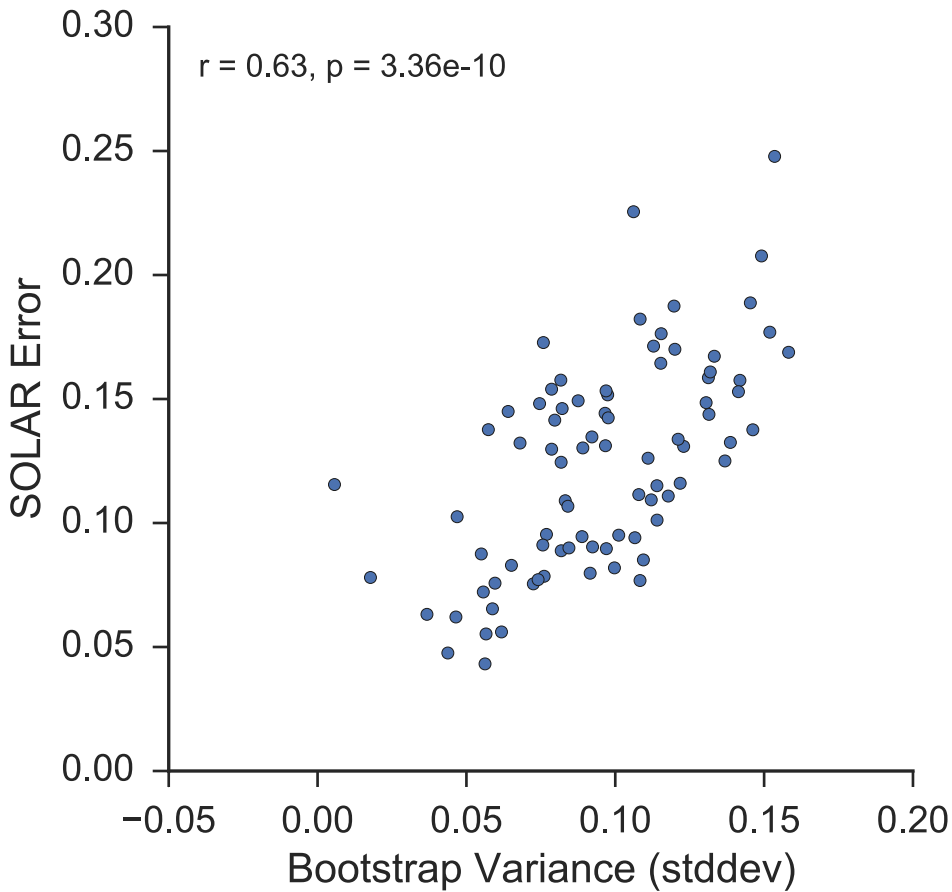

Supplement: NIHMS969055-supplement-1.pdf [file NIHMS969055-supplement-1.pdf]

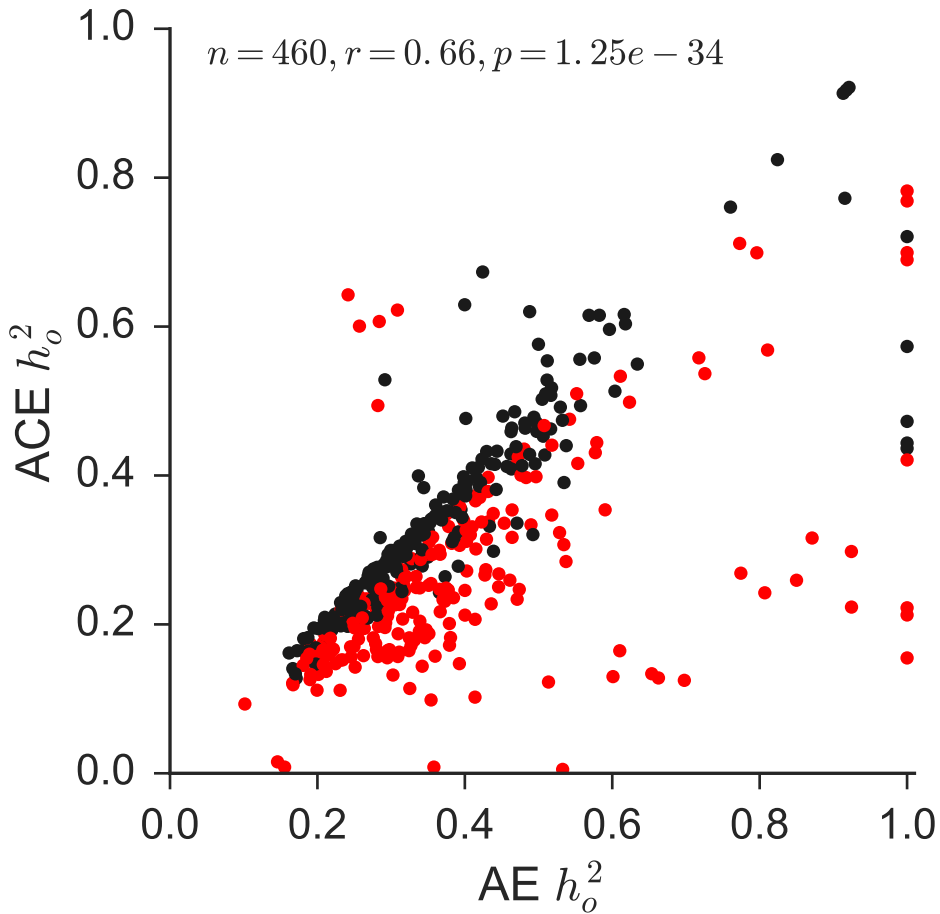

Supplement: NIHMS969055-supplement-2.pdf [file NIHMS969055-supplement-2.pdf]

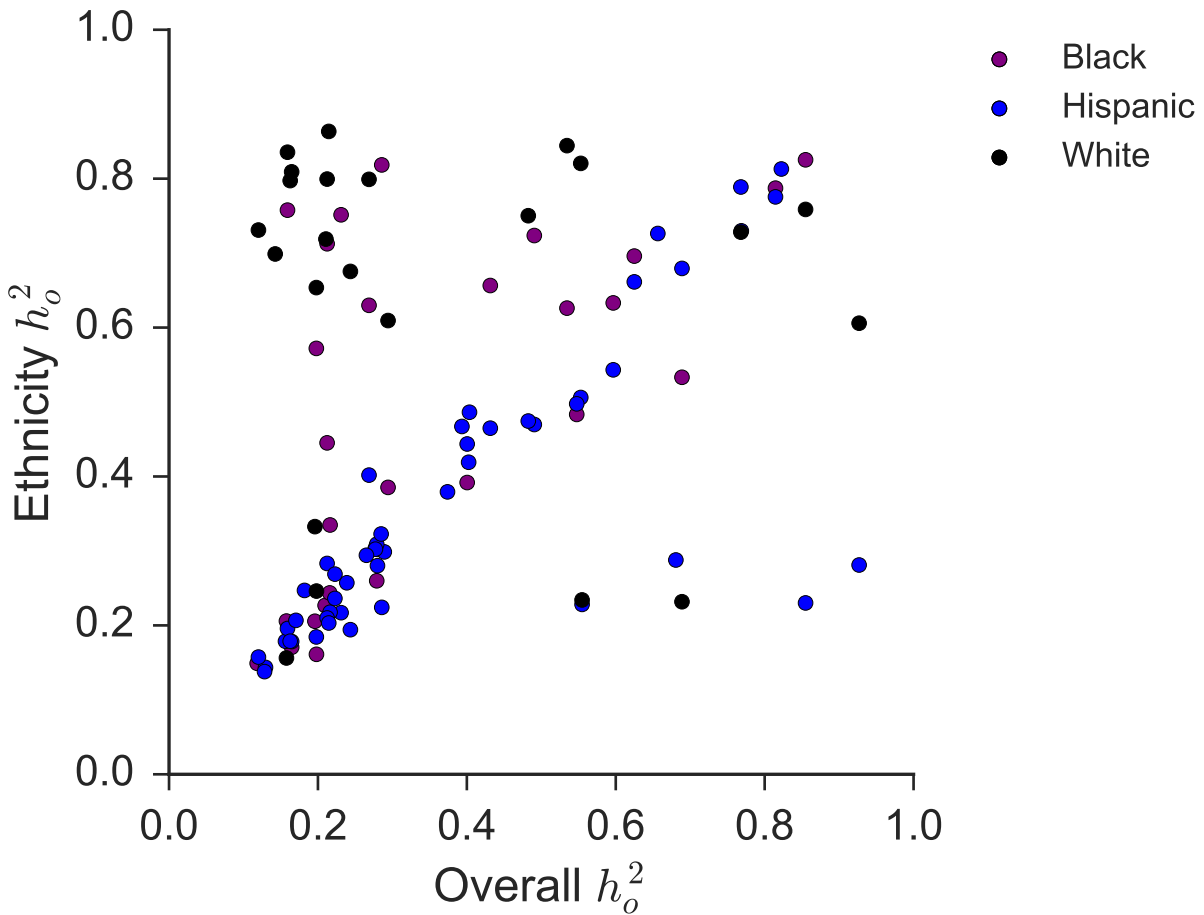

Supplement: NIHMS969055-supplement-3.pdf [file NIHMS969055-supplement-3.pdf]
